# Supplementary material
Source: ML conference proceedings conference paper supplement (https://openreview.net/forum?id=pYC3W83uwm)
Supplement: supplementary_material [file attachment]

## Sheet: SP
	distr_type	sample_type	init_type	lr	batch_size	final episode	n_start	n_end	L
Exp-20220116-091502-SP	uniform	pi^t-pi^0	pi^0	0.2	100	10000	10	100	0
Exp-20220116-091645-SP	uniform	pi^t-pi^0	pi^0	0.2	100	10000	10	100	0.01
Exp-20220117-090848-SP	uniform	pi^t	pi^0	0.2	100	130000	100	100	0
Exp-20220117-090813-SP	uniform	pi^t	pi^0	0.2	100	130000	100	100	0.01
Exp-20220116-112702-SP	uniform	pi^0	pi^0	0.2	100	30000	100	100	0
Exp-20220116-112733-SP	uniform	pi^0	pi^0	0.2	100	30000	100	100	0.01
Exp-20220116-112813-SP	uniform	pi^t	pi^0-pi^t	0.2	100	10000	10	100	0
Exp-20220116-112836-SP	uniform	pi^t	pi^0-pi^t	0.2	100	10000	10	100	0.01
Exp-20220114-121504-SP	2018011309	pi^t-pi^0	pi^0	0.2	100	10000	10	100	0
Exp-20220114-121550-SP	2018011309	pi^t-pi^0	pi^0	0.2	100	10000	10	100	0.01
Exp-20220114-165316-SP	2018011309	pi^t	pi^0	0.2	100	30000	100	100	0
Exp-20220114-121419-SP	2018011309	pi^t	pi^0	0.2	100	10000	100	100	0.01
Exp-20220114-165201-SP	2018011309	pi^0	pi^0	0.2	100	30000	100	100	0
Exp-20220114-165356-SP	2018011309	pi^0	pi^0	0.2	100	30000	100	100	0.01
Exp-20220114-120904-SP	2018011309	pi^t	pi^0-pi^t	0.2	100	10000	10	100	0
Exp-20220114-121237-SP	2018011309	pi^t	pi^0-pi^t	0.2	100	10000	10	100	0.01
Exp-20220114-144437-SP	19283746	pi^t-pi^0	pi^0	0.2	100	10000	10	100	0
Exp-20220114-144507-SP	19283746	pi^t-pi^0	pi^0	0.2	100	10000	10	100	0.01
Exp-20220114-144633-SP	19283746	pi^t	pi^0	0.2	100	10000	100	100	0
Exp-20220114-144727-SP	19283746	pi^t	pi^0	0.2	100	10000	100	100	0.01
Exp-20220114-165757-SP	19283746	pi^0	pi^0	0.2	100	30000	100	100	0
Exp-20220114-165902-SP	19283746	pi^0	pi^0	0.2	100	30000	100	100	0.01
Exp-20220114-145015-SP	19283746	pi^t	pi^0-pi^t	0.2	100	10000	10	100	0
Exp-20220114-165454-SP	19283746	pi^t	pi^0-pi^t	0.2	100	10000	10	100	0.01
Exp-20220114-165537-SP	200000308	pi^t-pi^0	pi^0	0.2	100	10000	10	100	0
Exp-20220114-165614-SP	200000308	pi^t-pi^0	pi^0	0.2	100	10000	10	100	0.01
Exp-20220114-185932-SP	200000308	pi^t	pi^0	0.2	100	30000	100	100	0
Exp-20220114-165945-SP	200000308	pi^t	pi^0	0.2	100	10000	100	100	0.01
Exp-20220114-210922-SP	200000308	pi^0	pi^0	0.2	100	30000	100	100	0
Exp-20220114-185747-SP	200000308	pi^0	pi^0	0.2	100	10000	100	100	0.01
Exp-20220114-185824-SP	200000308	pi^t	pi^0-pi^t	0.2	100	10000	10	100	0
Exp-20220114-185852-SP	200000308	pi^t	pi^0-pi^t	0.2	100	10000	10	100	0.01

## Sheet: OKD
	distr_type	sample_type	init_type	lr	batch_size	final episode	start	end
Exp-20220120-204913-OKD	uniform	pi^t-pi^0	pi^0	0.1	100	10000	(10,1,2)	(100,10,25)
Exp-20220115-093200-OKD	uniform	pi^t	pi^0	0.1	100	50000	(100,10,25)	(100,10,25)
Exp-20220115-093239-OKD	uniform	pi^0	pi^0	0.1	100	50000	(100,10,25)	(100,10,25)
Exp-20220120-204459-OKD	uniform	pi^t	pi^0-pi^t	0.1	100	20000	(10,1,2)	(100,10,25)
Exp-20220121-173212-OKD	2018011309	pi^t-pi^0	pi^0	0.1	100	20000	(10,1.5,2.5)	(100,15,30)
Exp-20220115-160627-OKD	2018011309	pi^t	pi^0	0.1	100	50000	(100,15,30)	(100,15,30)
Exp-20220115-201602-OKD	2018011309	pi^0	pi^0	0.1	100	50000	(100,15,30)	(100,15,30)
Exp-20220120-204716-OKD	2018011309	pi^t	pi^0-pi^t	0.1	100	20000	(10,1.5,2.5)	(100,15,30)
Exp-20220120-204832-OKD	20000308	pi^t-pi^0	pi^0	0.1	100	20000	(10,1,3)	(100,8,25)
Exp-20220115-232156-OKD	20000308	pi^t	pi^0	0.1	100	50000	(100,8,25)	(100,8,25)
Exp-20220116-091233-OKD	20000308	pi^0	pi^0	0.1	100	50000	(100,8,25)	(100,8,25)
Exp-20220120-205113-OKD	20000308	pi^t	pi^0-pi^t	0.1	100	20000	(10,1,3)	(100,8,25)
